# Supplementary material for: Achieving superior methanol oxidation electrocatalytic performance by surface reconstruction of PtNi nanoalloys during acid etching process
Source: Royal Society of Chemistry journal article supplement (doi:10.1039/d2gc04490k), 2023-01-01
Supplement: d2gc04490k1.pdf [file d2gc04490k1.pdf]

## Supporting Information

### **Achieving Superior Methanol Oxidation Electrocatalytic Performance by Surface Reconstruction of PtNi Nanoalloys during Acid Etching Process**

Xu Chen, Jinyu Zhao, Jie Lian, Xiaomin Wang\*

*College of Materials Science and Engineering, Taiyuan University of Technology,*

*030024, PR China*

*E-mail address: wangxiaomin@tyut.edu.cn (X. Wang)*

The apparent activation energy ( $E_a$ ) can be obtained from the fitting slope of Arrhenius diagram ( $\ln j$  vs.  $1/T$ ), according to the following equation:

$$I = Ae^{-\frac{E_a}{RT}} \quad (1)$$

where  $A$  is the pre-exponential,  $R$  represents gas constant, and  $T$  is the reaction temperature.

The potential measured with a SCE electrode can be transferred according to the following equation:

$$E_{(RHE)} = E_{(SCE)} + 0.2415 \text{ V} + 0.05916 \times \text{pH} \quad (2)$$

The hydrogen desorption region was used to integrate with the positive-going potential scan to obtain electrochemically active surface areas (ECSA) evaluated by the following equation:

$$\text{ECSA} = \frac{S}{MC\nu} \quad (3)$$

where  $S$  is the integral area of the hydrogen region obtained from the CV curve.  $M$  is the Pt loading on the surface of the electrode, and  $C$  is the H adsorption constant of Pt single crystal ( $0.21 \text{ mC cm}^{-2}$ ),  $\nu$  is the scanning speed ( $50 \text{ mV s}^{-1}$ ).

The mass activity and specific activity obtained from the following equations:

$$J_{k \text{ mass}} = \frac{J_k S}{M_{\text{Pt}}} \quad (4)$$

$$J_{k \text{ specific}} = \frac{J_k S}{\text{ECSA } M_{\text{Pt}}} \quad (5)$$

$J_k$  is the peak current density of catalysts obtained from the CV curves in  $0.5 \text{ M H}_2\text{SO}_4$  containing  $1 \text{ M CH}_3\text{OH}$  solution.  $S$  is the geometric area of the GCE.  $M_{\text{Pt}}$  is the

Pt loading on the surface of the electrode.

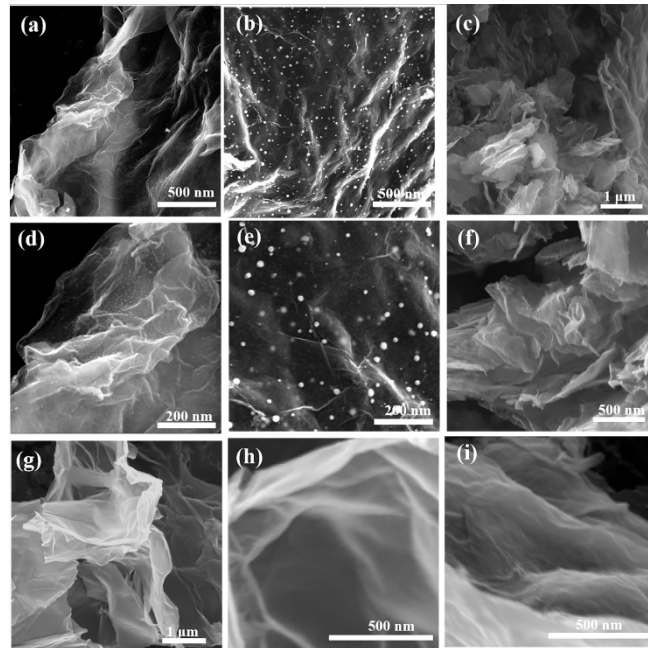

**Fig. S1** The SEM images of (a, d) Pt<sub>1.5</sub>Ni-NGA, (b, e) PtNi<sub>3</sub>-NGA (c, f) Pt-NGA, (g, h) rGO and (i) PtNi<sub>3</sub>-NGA precursor.

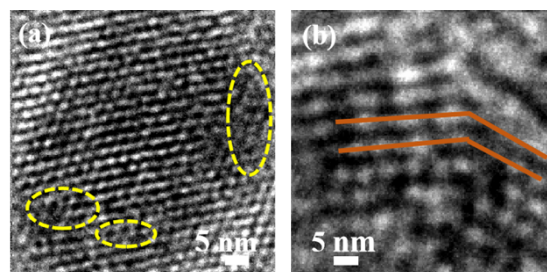

**Fig. S2** HRTEM images of Pt<sub>1.5</sub>Ni-NGA catalysts.

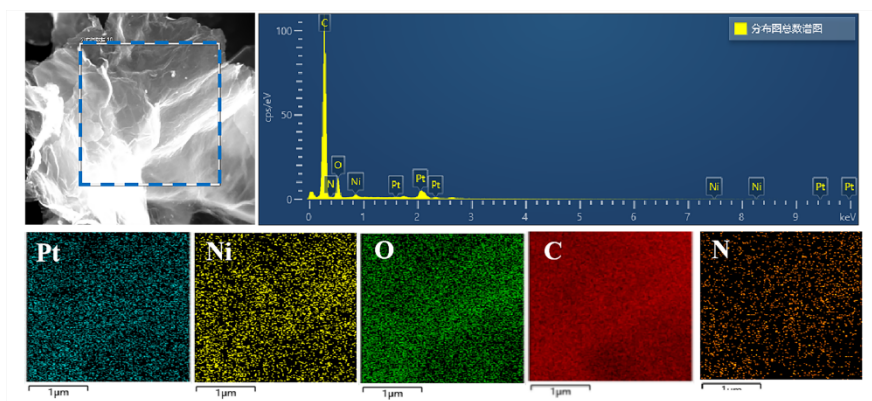

**Fig. S3** SEM and its corresponding EDS mapping images of Pt<sub>1.5</sub>Ni-NGA catalyst.

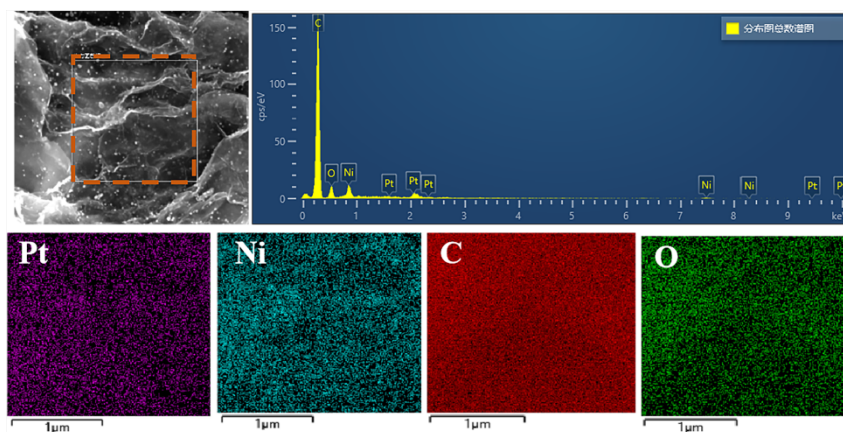

**Fig. S4** SEM and its corresponding EDS elemental mapping images of the PtNi<sub>3</sub>-NGA catalyst.

**Table S1** ICP results of the obtained samples.

| Sample                 | Pt (wt%) | Pt/Ni atomic ratio |
|------------------------|----------|--------------------|
| Pt <sub>3</sub> Ni-NGA | 13.9     | 3:1                |
| Pt <sub>2</sub> Ni-NGA | 13.5     | 1.98:1             |
| PtNi-NGA               | 12.5     | 1:1                |
| PtNi <sub>2</sub> -NGA | 10.8     | 1:2                |
| PtNi <sub>3</sub> -NGA | 15.5     | 1:3.1              |

|                          |      |       |
|--------------------------|------|-------|
| PtNi <sub>4</sub> -NGA   | 8.4  | 1:4   |
| Pt <sub>1.5</sub> Ni-NGA | 9.5  | 1.5:1 |
| Pt-NGA                   | 23.5 |       |
| PtNi <sub>3</sub> -rGO   | 21   | /     |
| Pt/C                     | 20   |       |

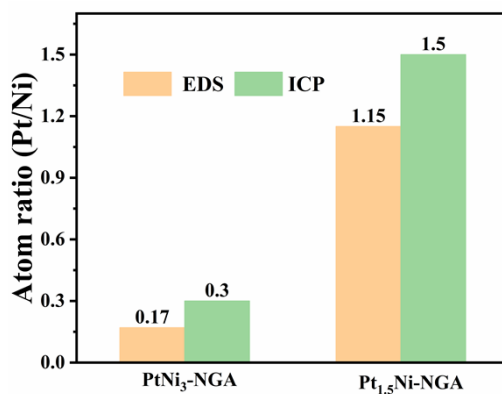

Fig. S5 Pt/Ni atom ratio characterized by EDS and ICP-OES.

Table S2 The Percentage of elements from EDS elemental mapping.

| Samples                  | Elements (Wt %) |      |       |       |      | Pt/Ni (at%) |
|--------------------------|-----------------|------|-------|-------|------|-------------|
|                          | Pt              | Ni   | O     | C     | N    |             |
| Pt <sub>1.5</sub> Ni-NGA | 7.73            | 2.04 | 11.04 | 78.53 | 0.67 | 1.15        |
| PtNi <sub>3</sub> -NGA   | 4.11            | 7.45 | 6.37  | 82.06 | 0    | 0.17        |

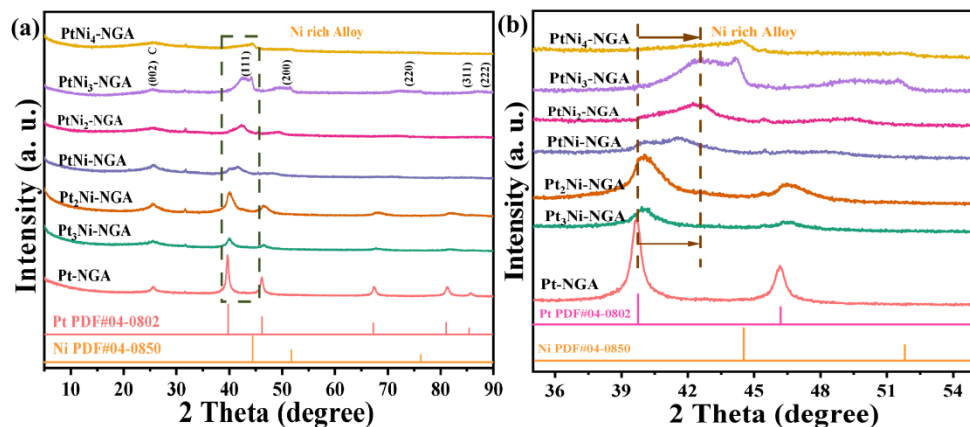

Fig. S6 (a) XRD patterns and (b) the corresponding magnified views of Pt<sub>x</sub>Ni<sub>y</sub>-NGA samples with different Ni contents.

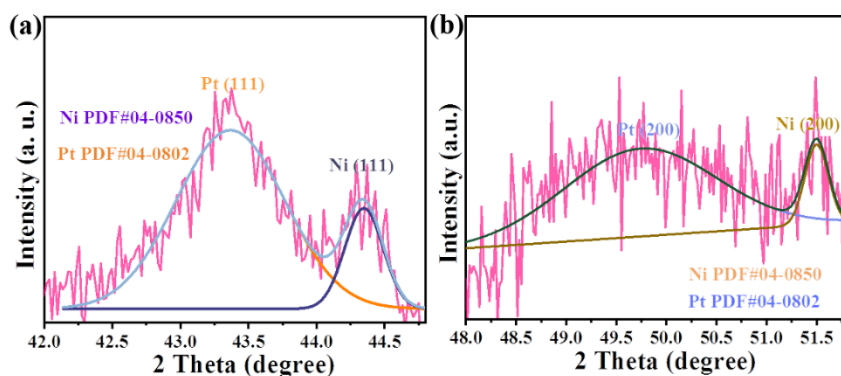

Fig. S7 The deconvolution of the broad peaks (a) at 42-45° and (b) 48-52°.

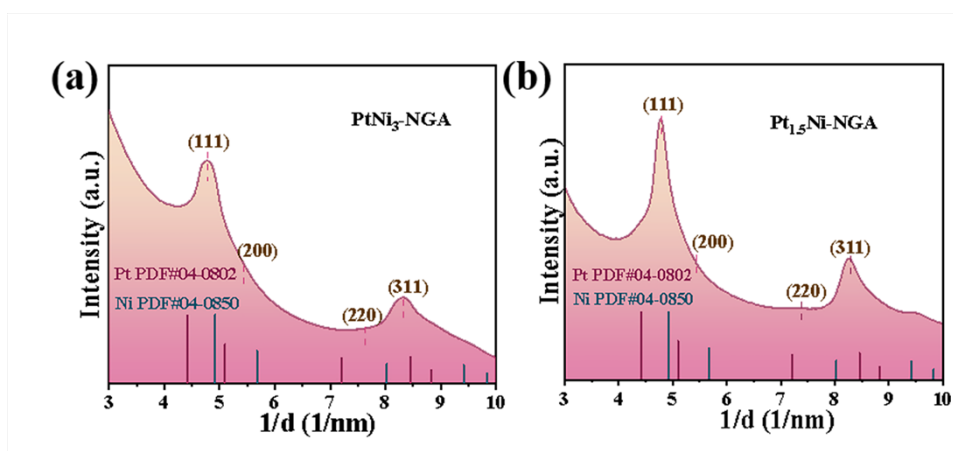

Fig. S8 SAED diffraction speckle calibration of (a) PtNi<sub>3</sub>-NGA and (b) Pt<sub>1.5</sub>Ni-NGA.

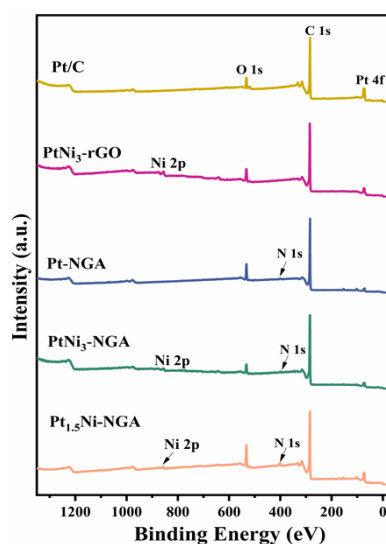

**Fig. S9** XPS survey spectra of Pt<sub>1.5</sub>Ni-NGA, PtNi<sub>3</sub>-NGA, Pt-NGA, PtNi<sub>3</sub>-rGO and Pt/C catalysts.

**Table S3** The Percentage of elements obtained from XPS.

| Samples                  | Elements (Atom %) |      |       |      |       |
|--------------------------|-------------------|------|-------|------|-------|
|                          | Pt                | Ni   | C     | N    | Pt/Ni |
| Pt <sub>1.5</sub> Ni-NGA | 0.42              | 0.31 | 96.11 | 3.17 | 1.35  |
| PtNi <sub>3</sub> -NGA   | 0.60              | 1.12 | 96.17 | 2.11 | 0.54  |
| Pt-NGA                   | 0.44              | -    | 97.56 | 2    | -     |
| PtNi <sub>3</sub> -rGO   | 0.97              | 1.99 | 97.04 | -    | 0.49  |
| Pt/C                     | 2.32              | -    | 97.68 | -    | -     |



**Table S4** Binding energies and surface components for Pt 4f core level region of all catalysts.

| Catalysts                | Pt <sup>0</sup>     | Pt <sup>2+</sup>    |
|--------------------------|---------------------|---------------------|
|                          | Binding energy (eV) | Binding energy (eV) |
| Pt <sub>1.5</sub> Ni-NGA | 71.92               | 73.63               |
|                          | 75.23               | 76.93               |
| PtNi <sub>3</sub> -NGA   | 71.65               | 73.18               |
|                          | 74.98               | 76.51               |
| Pt-NGA                   | 71.11               | 73.03               |
|                          | 74.44               | 76.01               |
| PtNi <sub>3</sub> -rGO   | 71.70               | 73.50               |
|                          | 75.03               | 76.83               |
| Pt/C                     | 71.20               | 72.40               |
|                          | 74.53               | 75.73               |

**Table S5** Contents of nitrogen based on N 1s high-resolution XPS analysis for different samples.

| Sample                   | Configuration of nitrogen (%) |                |                 |                |
|--------------------------|-------------------------------|----------------|-----------------|----------------|
|                          | Pyridinic N (%)               | Pyrrolic N (%) | Graphitic N (%) | Oxidized N (%) |
| Pt <sub>1.5</sub> Ni-NGA | 32.7                          | 14.0           | 23.7            | 29.6           |
| PtNi <sub>3</sub> -NGA   | 26.6                          | 43.7           | 20.3            | 9.4            |
| Pt-NGA                   | 38.6                          | 22.2           | 36.3            | 2.9            |

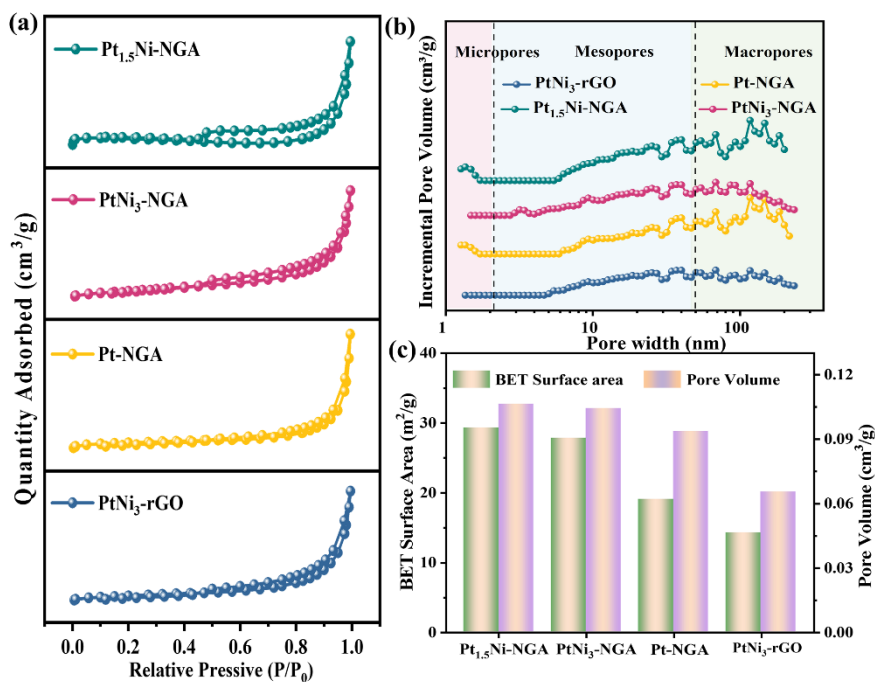

**Fig. S10** (a) N<sub>2</sub> adsorption/desorption isotherms, (b) corresponding pore distribution, (c) the BET and the pore volume distribution histograms of prepared catalysts.

**Table S6** The BET and total pore volume of all samples.

| Samples                  | S <sub>BET</sub> (m <sup>2</sup> /g) | V <sub>t</sub> (cm <sup>3</sup> /g) |
|--------------------------|--------------------------------------|-------------------------------------|
| Pt <sub>1.5</sub> Ni-NGA | 29.2779                              | 0.106306                            |
| PtNi <sub>3</sub> -NGA   | 27.8300                              | 0.104293                            |
| Pt-NGA                   | 19.0169                              | 0.093555                            |
| PtNi <sub>3</sub> -rGO   | 14.2000                              | 0.065207                            |

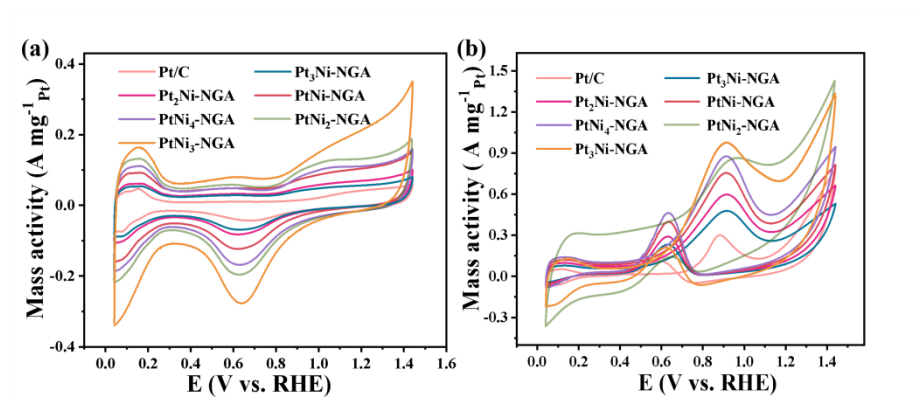

**Fig. S11** Catalytic activity characterizations. (a) CV curves in 0.5 M  $\text{H}_2\text{SO}_4$  solution at a scan rate of  $50 \text{ mV s}^{-1}$  and (b) CV curves in 0.5 M  $\text{H}_2\text{SO}_4 + 1.0 \text{ M CH}_3\text{OH}$  solution at a scan rate of  $50 \text{ mV s}^{-1}$ .

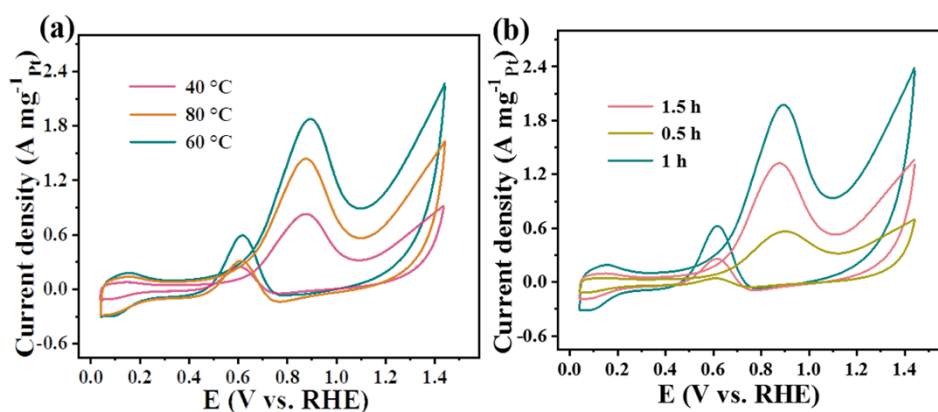

**Fig. S12** CV curves of  $\text{PtNi}_3\text{-NGA}$  acid etching (a) for 1 h from  $40 \text{ }^\circ\text{C}$  to  $80 \text{ }^\circ\text{C}$ , (b) at  $60 \text{ }^\circ\text{C}$  for 0.5-1.5 h in  $0.5 \text{ M H}_2\text{SO}_4 + 1.0 \text{ M CH}_3\text{OH}$ .

**Table S7** The comparison of ESCA, Mass activity and Specific activity of all samples.

| Sample                   | ESCA ( $\text{m}^2 \text{g}^{-1}$ ) | Mass activity ( $\text{A mg}^{-1}$ ) | Specific activity ( $\text{mA cm}^{-2}$ ) |
|--------------------------|-------------------------------------|--------------------------------------|-------------------------------------------|
| Pt <sub>1.5</sub> Ni-NGA | 205.10                              | 1.88                                 | 0.93                                      |
| PtNi <sub>3</sub> -NGA   | 155.79                              | 0.98                                 | 0.92                                      |
| Pt-NGA                   | 78.62                               | 0.79                                 | 0.81                                      |
| PtNi <sub>3</sub> -rGO   | 59.93                               | 0.58                                 | 0.97                                      |
| Pt/C                     | 50.78                               | 0.30                                 | 0.59                                      |

**Table S8** Comparison of the MOR performance for recently reported Pt-based electrocatalysts in acid electrolytes.

| Catalysts                                                  | Mass activity<br>( $\text{A mg}_{\text{Pt}}^{-1}$ ) | Electrolyte                                                     | References |
|------------------------------------------------------------|-----------------------------------------------------|-----------------------------------------------------------------|------------|
| Pt <sub>1.5</sub> Ni-NGA                                   | 1.88                                                | 0.5 M H <sub>2</sub> SO <sub>4</sub> + 1.0 M CH <sub>3</sub> OH | This work  |
| Pd <sub>59</sub> Fe <sub>27</sub> Pt <sub>14</sub>         | 1.61                                                | 0.1 M HClO <sub>4</sub> + 0.5 M CH <sub>3</sub> OH              | [1]        |
| PtNiNF-NGA                                                 | 1.65                                                | 0.1 M HClO <sub>4</sub> + 1.0 M CH <sub>3</sub> OH              | [2]        |
| PtFe (1:2) @a-FeO <sub>x</sub> /NC-C                       | 1.48                                                | 0.5 M H <sub>2</sub> SO <sub>4</sub> + 1.0 M CH <sub>3</sub> OH | [3]        |
| CuNi@Pt-Cu nano-octahedra                                  | 0.99                                                | 0.1 M HClO <sub>4</sub> + 1.0 M CH <sub>3</sub> OH              | [4]        |
| PtFe@PtRuFe                                                | 0.69                                                | 0.1 M HClO <sub>4</sub> + 0.5 M CH <sub>3</sub> OH              | [5]        |
| d-Pt@Ru dodecahedra                                        | 0.80                                                | 0.5 M H <sub>2</sub> SO <sub>4</sub> + 1.0 M CH <sub>3</sub> OH | [6]        |
| ae-P <sub>3</sub> Te <sub>6</sub> Co <sub>2</sub> nanorods | 1.47                                                | 0.1 M HClO <sub>4</sub> + 0.5 M CH <sub>3</sub> OH              | [7]        |
| PtCo nanocrosses                                           | 0.69                                                | 0.5 M H <sub>2</sub> SO <sub>4</sub> + 1.0 M CH <sub>3</sub> OH | [8]        |
| Ir-Pt-Cu                                                   | 1.04                                                | 0.1 M HClO <sub>4</sub> + 0.5 M CH <sub>3</sub> OH              | [9]        |
| 0.5%Sn/Pt <sub>3</sub> Mn                                  | 0.65                                                | 0.5 M H <sub>2</sub> SO <sub>4</sub> + 2.0 M CH <sub>3</sub> OH | [10]       |
| Hollow PtCu nanotube                                       | 1.33                                                | 0.5 M H <sub>2</sub> SO <sub>4</sub> + 1.0 M CH <sub>3</sub> OH | [11]       |

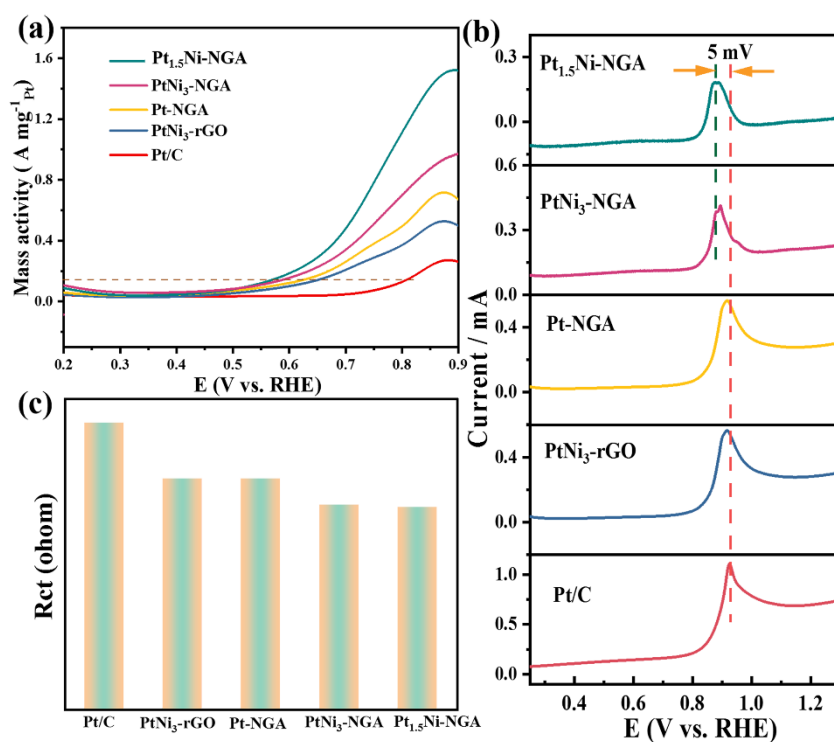

**Fig. S13** (a) LSV curves of all catalysts in 0.5 M H<sub>2</sub>SO<sub>4</sub> + 1.0 M CH<sub>3</sub>OH at a sweeping rate of 5 mV s<sup>-1</sup>. (b) CO-stripping curves obtained in 0.5 M H<sub>2</sub>SO<sub>4</sub> at a scan rate of 50 mV s<sup>-1</sup>. (c)

Histograms of Rct derived from the electrochemical impedance plots.

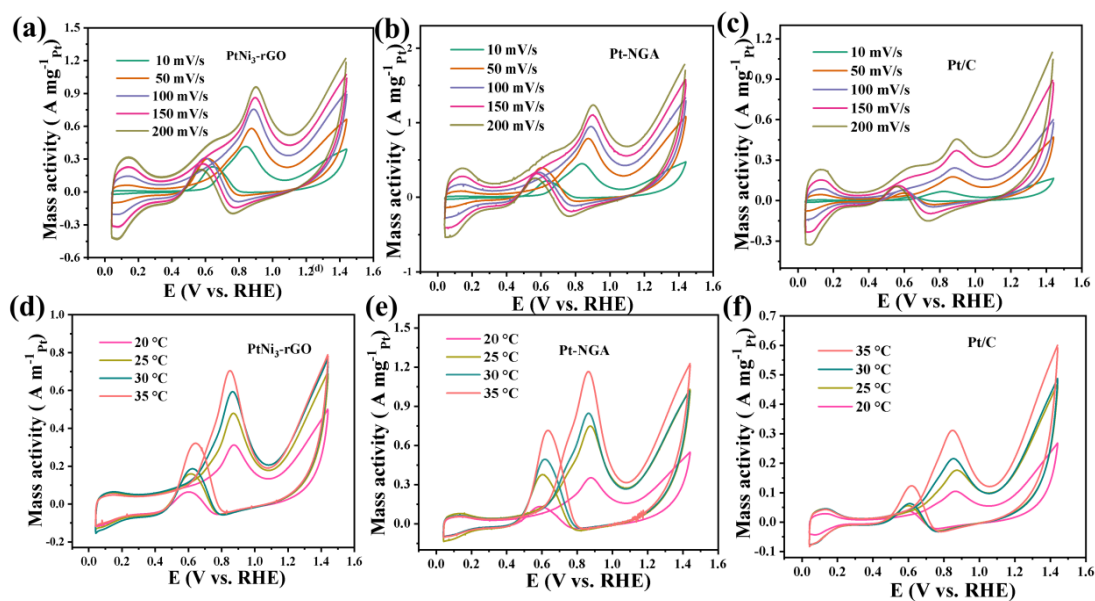

**Fig. S14** (a-c) MOR CV curves at various scan rate of PtNi<sub>3</sub>-rGO, Pt-NGA and Pt/C. (d-f) MOR

CV curves of PtNi<sub>3</sub>-rGO, Pt-NGA and Pt/C catalysts at 50 mV/s from 20 °C to 35 °C in 0.5 M H<sub>2</sub>SO<sub>4</sub> + 1.0 M CH<sub>3</sub>OH.

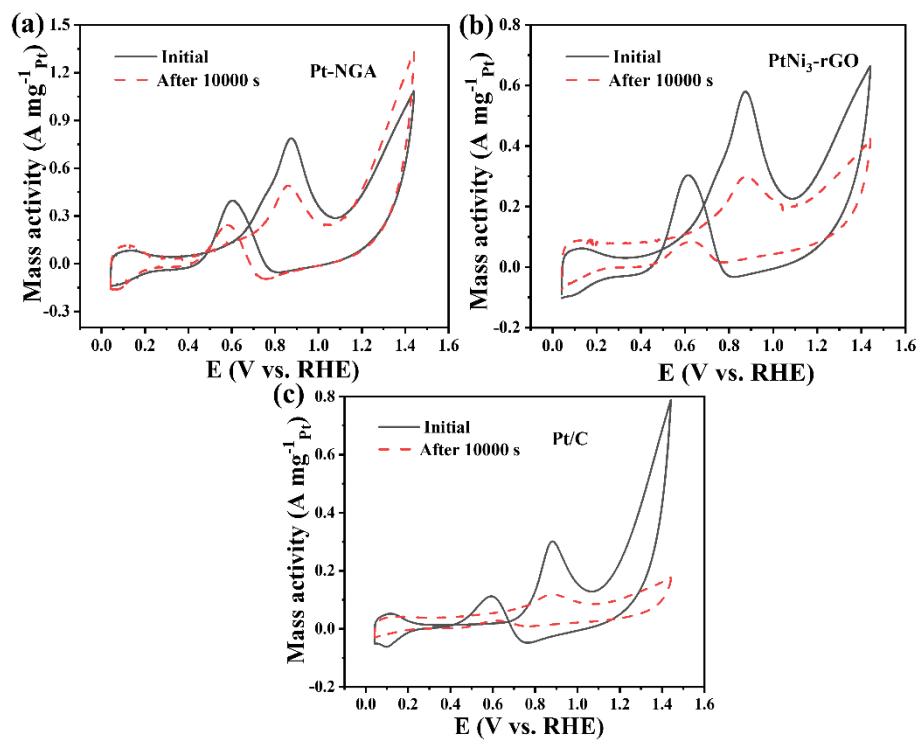

**Fig. S15** MOR CV curves of (a) Pt-NGA, (b) PtNi<sub>3</sub>-rGO and (c) Pt/C, recorded before (solid line) and after (dotted line) 10000 s i-t test.

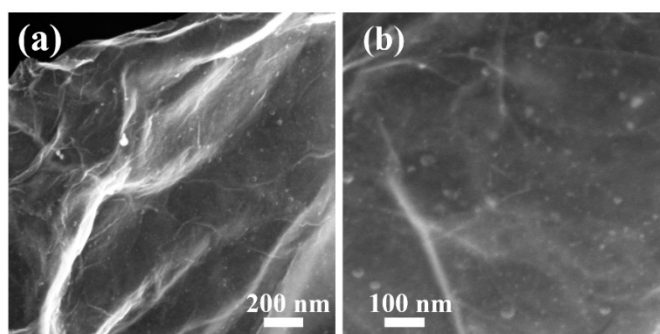

**Fig. S16** SEM images of Pt<sub>1.5</sub>Ni-NGA catalyst after 10000 s i-t test.

## References

- [1] Luo, X., C. Liu, X. Wang, Q. Shao, Y. Pi, T. Zhu, Y. Li, and X. Huang. "Spin Regulation on 2D Pd-Fe-Pt Nanomeshes Promotes Fuel Electrooxidations." *Nano Lett*, 20, 2020, 1967-73.
- [2] Yang, J., R. Hubner, J. Zhang, H. Wan, Y. Zheng, H. Wang, H. Qi, et al. "A Robust PtNi Nanoframe/N-Doped Graphene Aerogel Electrocatalyst with Both High Activity and Stability." *Angew Chem Int Ed Engl*, 60, 17, 2021, 9590-97.
- [3] Zhao, W., L. Ma, M. Gan, X. Li, Y. Zhang, X. Hua, and L. Wang. "Engineering Intermetallic-Metal Oxide Interface with Low Platinum Loading for Efficient Methanol Electrooxidation." *J Colloid Interface Sci*, 604, 2021, 52-60.
- [4] Li, C., X. Chen, L. Zhang, S. Yan, A. Sharma, B. Zhao, A. Kumbhar, G. Zhou, and J. Fang. "Synthesis of Core@Shell Cu-Ni@Pt-Cu Nano-Octahedra and Their Improved Mor Activity." *Angew Chem Int Ed Engl*, 60, 14, 2021, 7675-80.
- [5] Wang, Qingmei, Siguo Chen, Pan Li, Shumaila Ibraheem, Jia Li, Jianghai Deng, and Zidong Wei. "Surface Ru Enriched Structurally Ordered Intermetallic PtFe@PtRuFe Core-Shell Nanostructure Boosts Methanol Oxidation Reaction Catalysis." *Applied Catalysis B: Environmental*, 252, 2019, 120-27.
- [6] Bai, X., J. Geng, S. Zhao, H. Li, and F. Li. "Tunable Hollow Pt@Ru Dodecahedra Via Galvanic Replacement for Efficient Methanol Oxidation." *ACS Appl Mater Interfaces*, 12, 20, 2020, 23046-50.
- [7] Li, Jie, Cheng Wang, Hongyuan Shang, Yuan Wang, Huaming You, Hui Xu, and Yukou Du. "Metal-Modified PtTe<sub>2</sub> Nanorods: Surface Reconstruction for Efficient

Methanol Oxidation Electrocatalysis." *Chemical Engineering Journal*, 424, 2021.

[8] Li, Zhijuan, Xian Jiang, Xiaoru Wang, Jinrui Hu, Yuanyuan Liu, Gengtao Fu, and Yawen Tang. "Concave PtCo Nanocrosses for Methanol Oxidation Reaction." *Applied Catalysis B: Environmental*, 277 2020.

[9] Peng, K., W. Zhang, N. Bhuvanendran, Q. Ma, Q. Xu, L. Xing, L. Khotseng, and H. Su. "Pt-Based (Zn, Cu) Nanodendrites with Enhanced Catalytic Efficiency and Durability toward Methanol Electro-Oxidation Via Trace Ir-Doping Engineering." *J Colloid Interface Sci*, 598, 2021, 126-35.

[10] Li, Yunrui, Yao Wang, Shuna Li, Mingxuan Li, Yujie Liu, Xu Fang, Xiaoping Dai, and Xin Zhang. "Pt<sub>3</sub>Mn Alloy Nanostructure with High-Index Facets by Sn Doping Modified for Highly Catalytic Active Electro-Oxidation Reactions." *Journal of Catalysis*, 395, 2021, 282-92.

[11] Xu, F., S. Cai, B. Lin, L. Yang, H. Le, and S. Mu. "Geometric Engineering of Porous PtCu Nanotubes with Ultrahigh Methanol Oxidation and Oxygen Reduction Capability." *Small*, 2022, e2107387.
